# Supplementary material
Source: PubMed Central journal article supplement (PMC6218830)
Supplement: CJN.01070118SupplementaryData.pdf [file CJN.01070118SupplementaryData.pdf]

## Supplementary tables and figures

**Supplementary Table 1. Univariable logistic regressions assessing whether characteristics of complete peripheral depletion associate with complete response at week 78 including urinary sediment in the definition of complete response.**

|                                                                    | N (%) with complete response | Unadjusted Odds Ratio (95% CI) | P value |
|--------------------------------------------------------------------|------------------------------|--------------------------------|---------|
| Complete peripheral depletion                                      |                              | 4.9 (1.02, 24)                 | 0.04    |
| Achieved (n=53)                                                    | 23 (43%)                     |                                |         |
| Not achieved (n=15)                                                | 2 (13%)                      |                                |         |
| Duration of complete peripheral depletion                          |                              | 3.2 (1.1, 9.1)                 | 0.02    |
| ≥ 71 days (n=34)                                                   | 17 (50%)                     |                                |         |
| < 71 days (n=34)                                                   | 8 (24%)                      |                                |         |
| Each incremental delay of 30 days to complete peripheral depletion | 25 (37%)                     | 0.90 (0.82, 0.98)              | 0.02    |

CI, confidence interval.

**Supplementary Table 2A. Univariable logistic regressions assessing peripheral depletion CD19 < 5 cells/μL and its associations with complete response at week 78.**

|                                                 | N (%) with complete response | Unadjusted Odds Ratio (95% CI) | P value |
|-------------------------------------------------|------------------------------|--------------------------------|---------|
| Achievement of peripheral depletion             |                              | 1                              | -       |
| Achieved (n=68)                                 | 27 (40%)                     |                                |         |
| Not achieved (n=0)                              | 0 (0%)                       |                                |         |
| Duration of peripheral depletion                |                              | 1.4 (0.54, 3.8)                | 0.4     |
| ≥ 301 days (n=34)                               | 15 (44%)                     |                                |         |
| < 301 days (n=34)                               | 12 (35%)                     |                                |         |
| Every incremental delay of 30 days to depletion | 27 (40%)                     | 0.99 (0.68, 1.4)               | 0.9     |

**Supplementary Table 2B. Univariable logistic regressions assessing peripheral depletion CD19 < 20 cells/μL and its associations with complete response at week 78.**

|  | N (%) with complete response | Unadjusted Odds Ratio (95% CI) | P value |
|--|------------------------------|--------------------------------|---------|
|--|------------------------------|--------------------------------|---------|

|                                                 |          |                 |     |
|-------------------------------------------------|----------|-----------------|-----|
| Achievement peripheral depletion                |          | 1               | -   |
| Achieved (n=68)                                 | 27 (40%) |                 |     |
| Not achieved (n=0)                              | 0 (0%)   |                 |     |
| Duration of peripheral depletion                |          | 1.4 (0.54, 3.8) | 0.4 |
| ≥ 394 days (n=34)                               | 15 (44%) |                 |     |
| < 394 days (n=34)                               | 12 (35%) |                 |     |
| Every incremental delay of 30 days to depletion | 27 (40%) | 1.1 (0.40, 3.3) | 0.8 |

CI, confidence interval.

**Supplementary Table 3. Univariable logistic regressions assessing whether characteristics of complete peripheral depletion associate with complete response at week 52.**

|                                                                    | N (%) with complete response | Unadjusted Odds Ratio (95% CI) | P value |
|--------------------------------------------------------------------|------------------------------|--------------------------------|---------|
| Complete peripheral depletion                                      |                              | 1.8 (0.50, 6.4)                | 0.3     |
| Achieved (n=53)                                                    | 21 (40%)                     |                                |         |
| Not achieved (n=15)                                                | 4 (27%)                      |                                |         |
| Duration of complete peripheral depletion                          |                              | 1.4 (0.54, 3.9)                | 0.4     |
| ≥ 64 days (n=34)                                                   | 14 (42%)                     |                                |         |
| < 64 days (n=34)                                                   | 11 (32%)                     |                                |         |
| Each incremental delay of 30 days to complete peripheral depletion | 25 (37%)                     | 0.98 (0.87, 1.1)               | 0.7     |

CI, confidence interval.

**Supplementary Figure 1. Kaplan-Meier graphs depicting A) Time to CD19 < 20 cells/μL, in days. Line denotes day 86 which is the last day that participants ever achieved CD19 < 20 cells/μL. B) Time to CD19 < 5 cells/μL, in days. Line denotes day 182 which is the last day that participants ever achieved CD19 < 5 cells/μL.**

A.

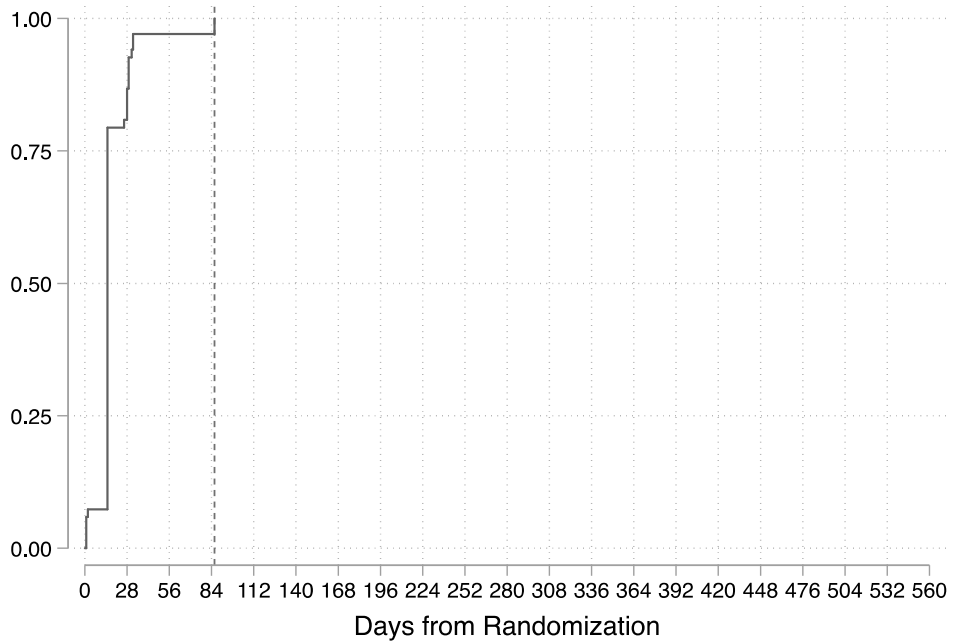

Number at risk

68 13 2 2 0 0 0 0 0 0 0 0 0 0 0 0 0 0 0 0

B.

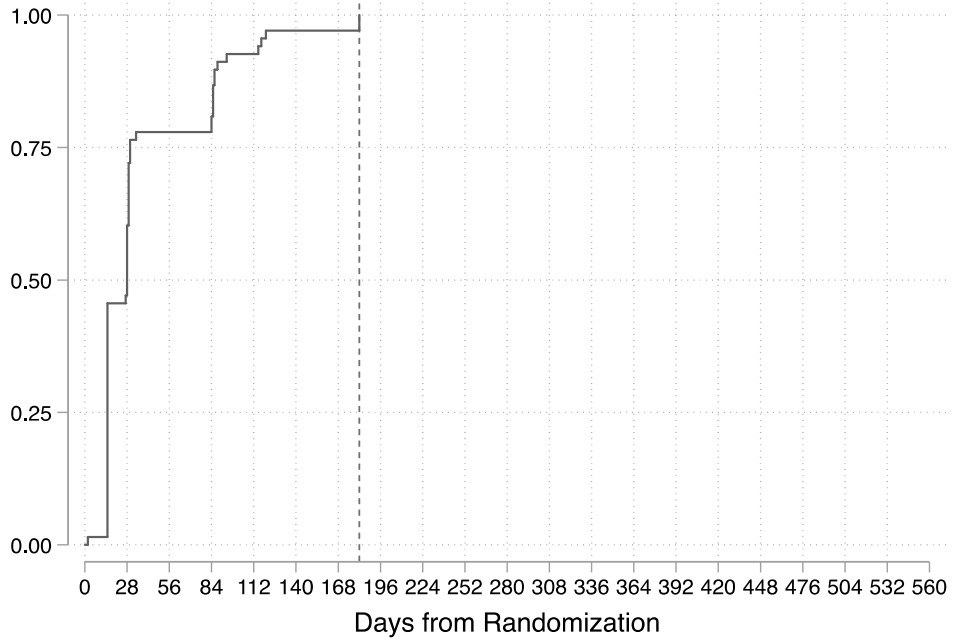

Number at risk

68 36 15 15 5 2 2 0 0 0 0 0 0 0 0 0 0 0 0 0
